# Supplementary material for: Determination of Mercury, Methylmercury and Selenium Concentrations in Elasmobranch Meat: Fish Consumption Safety
Source: MDPI journal article supplement (doi:10.3390/ijerph19020788), 2022-01-11
Supplement: s1 [file s1]

**Table S1.** Average and molar concentrations of the Hg, Se and selenium health benefit value (HBV<sub>Se</sub>).

| Species                  | Hg                 |                      | Se                 |                      | HBV <sub>Se</sub> |
|--------------------------|--------------------|----------------------|--------------------|----------------------|-------------------|
|                          | µg g <sup>-1</sup> | µmol g <sup>-1</sup> | µg g <sup>-1</sup> | µmol g <sup>-1</sup> |                   |
| Blue shark               | 0.63               | 3.14                 | 0.20               | 2.53                 | -1.36             |
| Porbeagle                | 1.25               | 6.23                 | 0.47               | 5.95                 | -0.57             |
| Picked dogfish           | 1.25               | 6.23                 | 0.40               | 5.07                 | -2.60             |
| Longnose spurdog         | 0.75               | 3.74                 | 0.42               | 5.32                 | 2.69              |
| Smooth-hound             | 1.03               | 5.13                 | 0.49               | 6.21                 | 1.96              |
| Starry smooth-hound      | 0.73               | 3.64                 | 0.39               | 4.94                 | 2.26              |
| Lesser spotted dogfish   | 0.61               | 3.04                 | 0.41               | 5.19                 | 3.41              |
| Thornback ray            | 0.65               | 3.24                 | 0.6                | 7.60                 | 6.22              |
| Brown ray                | 0.64               | 3.19                 | 0.5                | 6.33                 | 4.72              |
| Mediterranean starry ray | 0.62               | 3.09                 | 0.48               | 6.08                 | 4.51              |
| Sandy ray                | 0.58               | 2.89                 | 0.43               | 5.45                 | 3.91              |
| Longnosed skates         | 0.49               | 2.44                 | 0.38               | 4.81                 | 3.57              |
| Electric ray             | 1.22               | 6.08                 | 0.50               | 6.33                 | 0.49              |
| Common torpedo           | 0.87               | 4.34                 | 0.37               | 4.69                 | 0.67              |
| Marbled electric ray     | 1.14               | 5.68                 | 0.48               | 6.08                 | 0.77              |

**Table S2.** MeHg concentrations, daily (CR<sub>lim</sub>) and monthly (CR<sub>mm</sub>) consumption rate limit in the Italian general population.

| Species                  | µg g <sup>-1</sup> w.w. | CR <sub>lim</sub><br>(g day <sup>-1</sup> ) | CR <sub>mm</sub><br>(meals/month) |
|--------------------------|-------------------------|---------------------------------------------|-----------------------------------|
| Blue shark               | 0.57                    | 12                                          | 1                                 |
| Porbeagle                | 1.03                    | 7                                           | 1                                 |
| Picked dogfish           | 0.97                    | 7                                           | 1                                 |
| Longnose spurdog         | 0.65                    | 11                                          | 1                                 |
| Smooth-hound             | 0.89                    | 8                                           | 1                                 |
| Starry smooth-hound      | 0.68                    | 10                                          | 2                                 |
| Lesser spotted dogfish   | 0.57                    | 12                                          | 2                                 |
| Thornback ray            | 0.62                    | 11                                          | 1                                 |
| Brown ray                | 0.63                    | 11                                          | 2                                 |
| Mediterranean starry ray | 0.54                    | 13                                          | 2                                 |
| Sandy ray                | 0.50                    | 14                                          | 2                                 |
| Longnosed skates         | 0.41                    | 17                                          | 1                                 |
| Electric ray             | 1.10                    | 6                                           | 1                                 |
| Common torpedo           | 0.74                    | 9                                           | 1                                 |
| Marbled electric ray     | 1.03                    | 7                                           | 0                                 |
